# Supplementary material
Source: PubMed Central journal article supplement (PMC4011071)
Supplement: NIHMS440729-supplement-01.pdf [file NIHMS440729-supplement-01.pdf]

## SUPPLEMENTARY ONLINE DATA

# Evidence of mitochondrial dysfunction in fragile X-associated tremor/ataxia syndrome

Catherine ROSS-INTA\*, Alicja OMANSKA-KLUSEK\*, Sarah WONG\*, Cedrick BARROW\*, Dolores GARCIA-AROCENA†, Christine IWAHASHI†, Elizabeth BERRY-KRAVIS‡, Randi J. HAGERMAN§||, Paul J. HAGERMAN†|| and Cecilia GIULIVI\*<sup>1</sup>

\*Department of Molecular Biosciences, School of Veterinary Medicine, University of California Davis, Davis, CA 95616, U.S.A., †Department of Biochemistry and Molecular Medicine, School of Medicine, University of California Davis, Davis, CA 95616, U.S.A., ‡Department of Pediatrics, Neurological Sciences, and Biochemistry, Rush University Medical Center, University of Illinois at Chicago, IL 60612, U.S.A., §Department of Pediatrics, School of Medicine, University of California Davis, Davis, CA 95616, U.S.A., and ||M.I.N.D. Institute, School of Medicine, University of California Davis, Davis, CA 95616, U.S.A.

**Table S1 Information and description of antibodies used in the present study**

HRP, horseradish peroxidase; NFDm, non-fat dried milk; TBST, Tris-buffered saline (150 mM NaCl and 10 mM Tris/HCl, pH 7.5) with 0.1% Tween 20.

| Antibody              | Dilution | Company                      | Catalogue number | Host species | Blocking buffer                                     |
|-----------------------|----------|------------------------------|------------------|--------------|-----------------------------------------------------|
| <b>Primary</b>        |          |                              |                  |              |                                                     |
| Actin                 | 1:1000   | Santa Cruz Biotechnology     | sc-1615          | Goat         | TBST with 5% NFDm                                   |
| ATPB                  | 1:5000   | BD Transduction Laboratories | 612518           | Mouse        | TBST with 5% NFDm                                   |
| CCOIV                 | 1:1000   | Molecular Probes             | A21348           | Mouse        | TBST with 5% NFDm                                   |
| eIF2 $\alpha$         | 1:1000   | Cell Signaling Technology    | 9722             | Rabbit       | TBST with 5% NFDm                                   |
| Phospho-eIF2 $\alpha$ | 1:1000   | Cell Signaling Technology    | 9721             | Rabbit       | TBST with 5% NFDm                                   |
| MnSOD                 | 1:2000   | Upstate                      | 06-984           | Rabbit       | TBST with 5% NFDm                                   |
| Nitrotyrosine         | 1:2000   | Upstate                      | 05-233           | Mouse        | TBST with 10% normal goat serum, 1% BSA and 1% NFDm |
| VDAC1                 | 1:200    | Santa Cruz Biotechnology     | sc-8828          | Goat         | TBST with 5% NFDm                                   |
| <b>Secondary</b>      |          |                              |                  |              |                                                     |
| Goat HRP              | 1:5000   | Santa Cruz Biotechnology     | sc-2020          | Donkey       | Not applicable                                      |
| Mouse HRP             | 1:5000   | Zymed                        | 62-6520          | Goat         | Not applicable                                      |
| Rabbit HRP            | 1:5000   | Zymed                        | 62-6120          | Goat         | Not applicable                                      |

Received 23 December 2009/27 May 2010; accepted 1 June 2010  
 Published as BJ Immediate Publication 1 June 2010, doi:10.1042/BJ20091960

<sup>1</sup> To whom correspondence should be addressed (email cgiulivi@ucdavis.edu).
